# Supplementary material
Source: ML conference proceedings conference paper supplement (https://openreview.net/forum?id=IzdfeFH88G)
Supplement: supplementary_material [file attachment]

**FD\_Baseline - Task 0: Decision Boundary (Voronoi)**  
**10 Classes Learned**

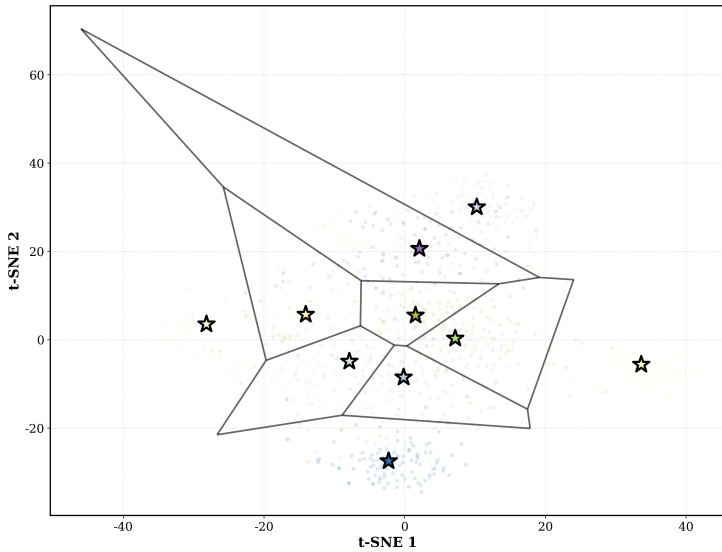

(a) FD Baseline - Task 0

**SGCL - Task 0: Decision Boundary (Voronoi)**  
**10 Classes Learned**

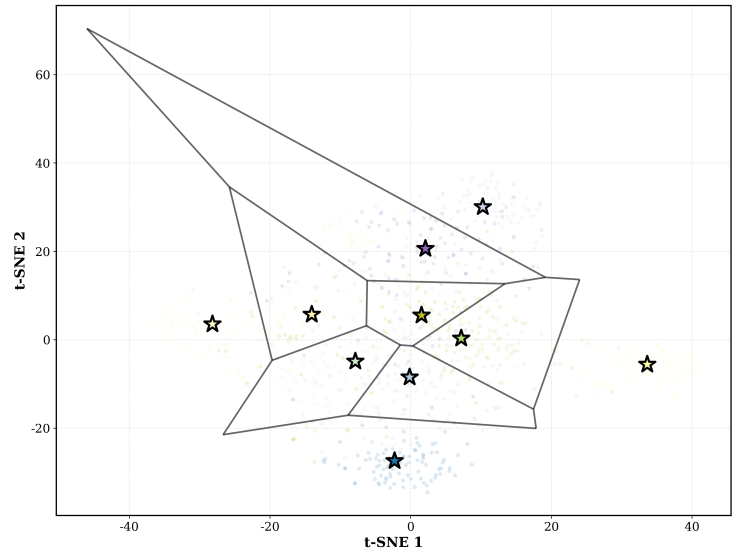

(b) SGCL - Task 0

**FD\_Baseline - Task 1: Decision Boundary (Voronoi)**  
**20 Classes Learned**

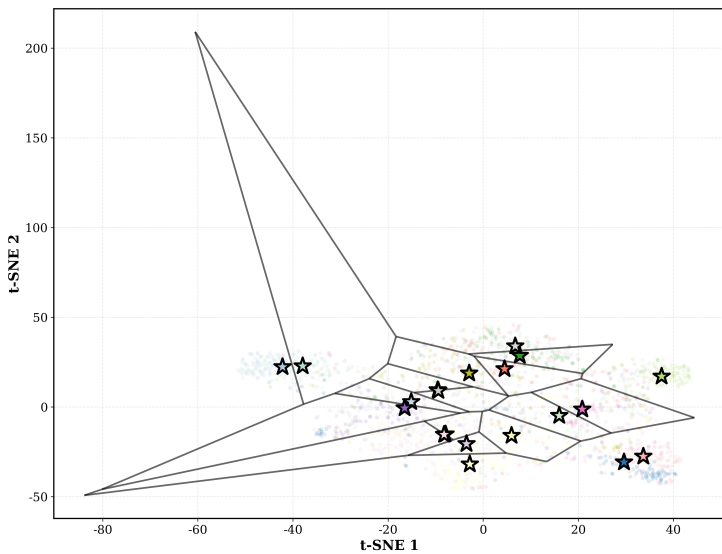

(c) FD Baseline - Task 1

**SGCL - Task 1: Decision Boundary (Voronoi)**  
**20 Classes Learned**

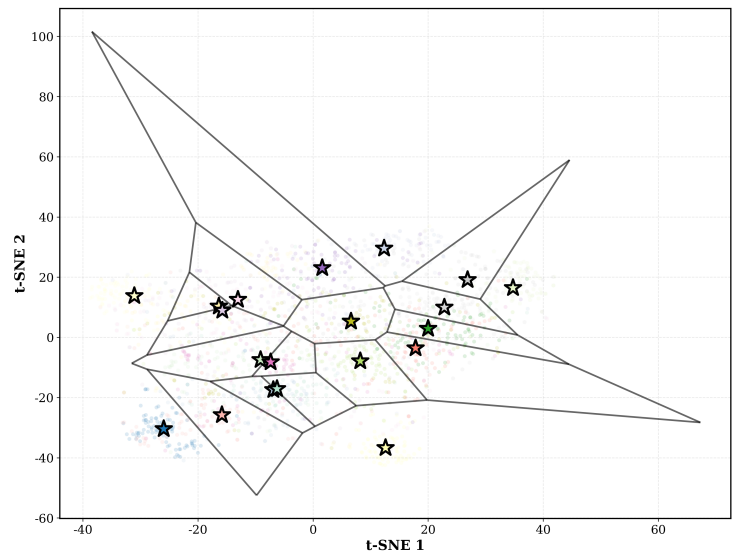

(d) SGCL - Task 1

**FD\_Baseline - Task 2: Decision Boundary (Voronoi)**  
**30 Classes Learned**

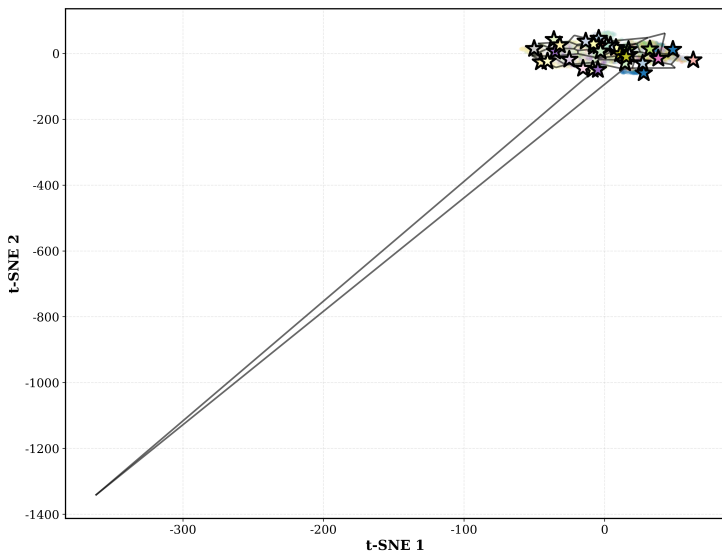

(e) FD Baseline - Task 2

**SGCL - Task 2: Decision Boundary (Voronoi)**  
**30 Classes Learned**

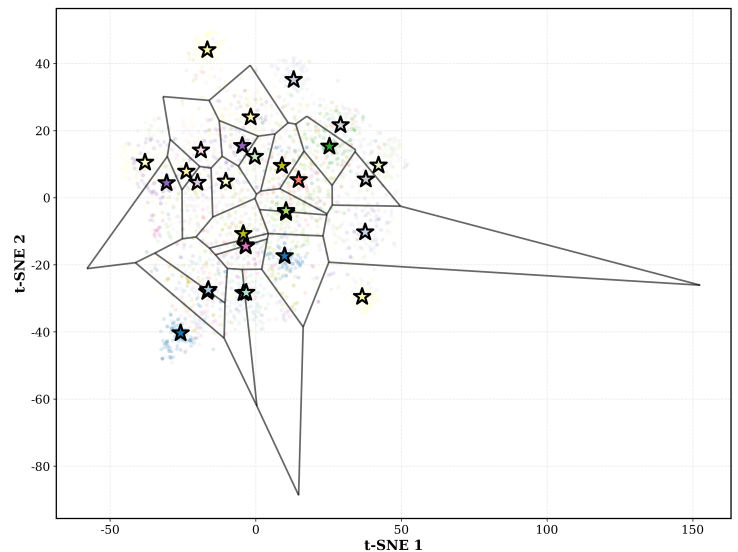

(f) SGCL - Task 2

Figure 1: Decision plane visualization comparison between FD Baseline and SGCL methods on CIFAR-100 10-task setup.
